# Supplementary material for: Fast synthesis of Ag–Pd@reduced graphene oxide bimetallic nanoparticles and their applications as carbon–carbon coupling catalysts
Source: Royal Society of Chemistry journal article supplement (doi:10.1039/c4ra05186f), 2014-06-24
Supplement: c4ra05186f1.pdf [file c4ra05186f1.pdf]

## Supplementary Information

### Fast Synthesis of Ag-Pd@reduced graphene oxide bimetallic nanoparticles and their applications as carbon-carbon coupling catalysts

Mingxi Chen<sup>a</sup> Zhe Zhang<sup>a</sup> Lingzhi Li<sup>a</sup> Yu Liu<sup>a\*</sup> Wei Wang<sup>b</sup> Jianping Gao<sup>a1</sup>

<sup>a</sup>School of Science, Tianjin University, Tianjin 300072, P R China

<sup>b</sup>School of Chemical Engineering, Tianjin University, Tianjin 300072, P R China

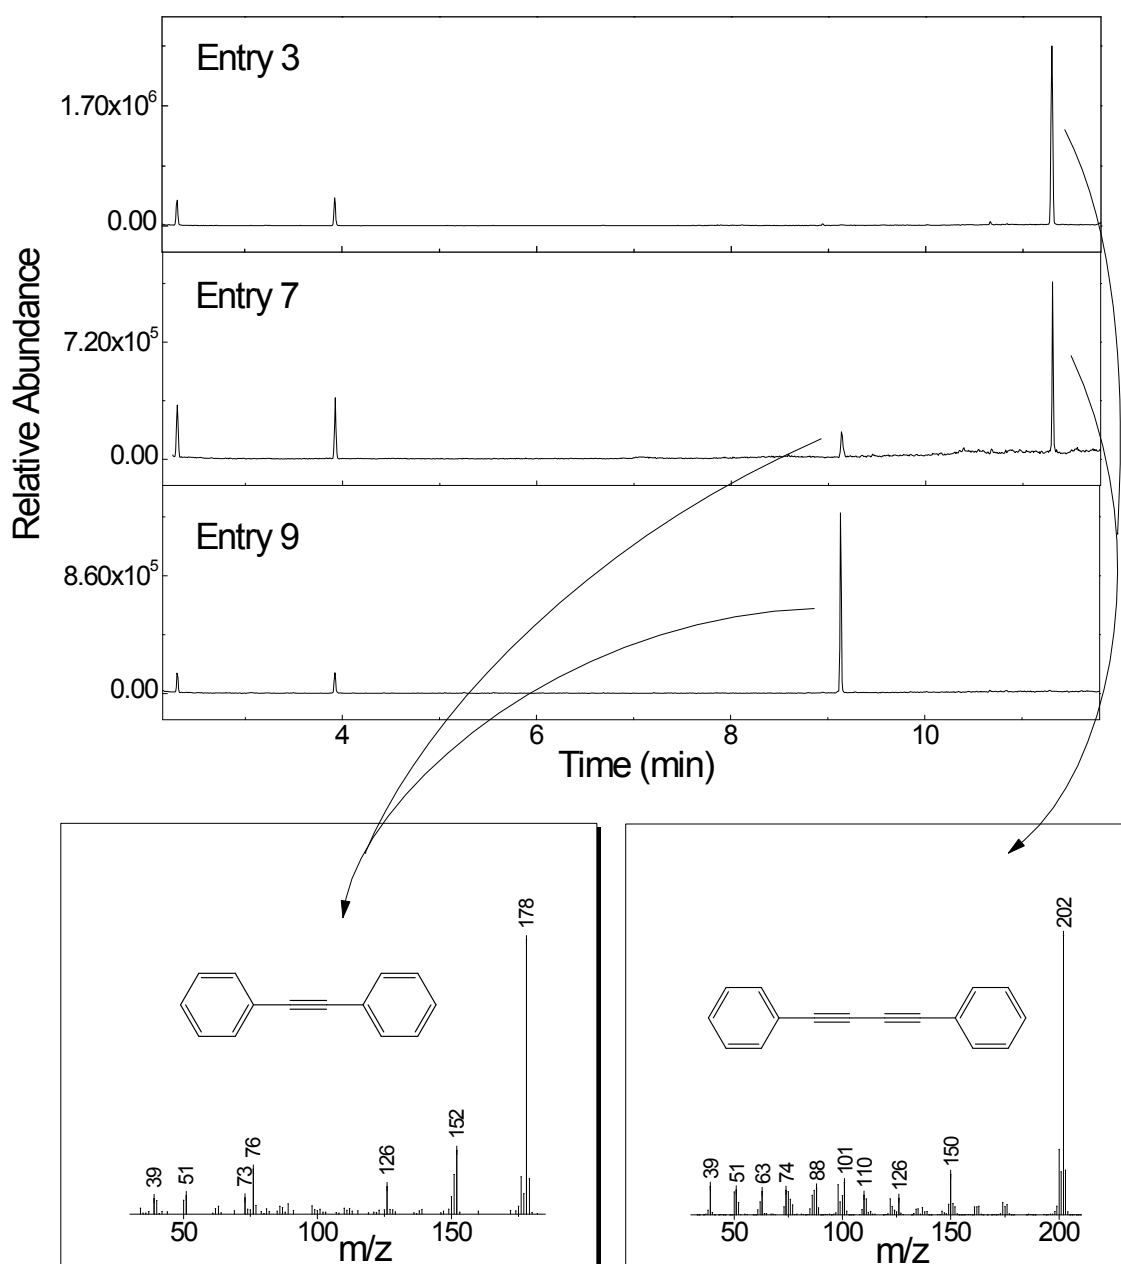

<sup>1</sup> Corresponding author. Tel.: +862227403475; Fax: (+86)22-2740-3475.  
E-mail address: jianpinggaols@126.com (J.P. Gao).

Figure S1. GC-MS of Sonogashira carbon coupling reaction

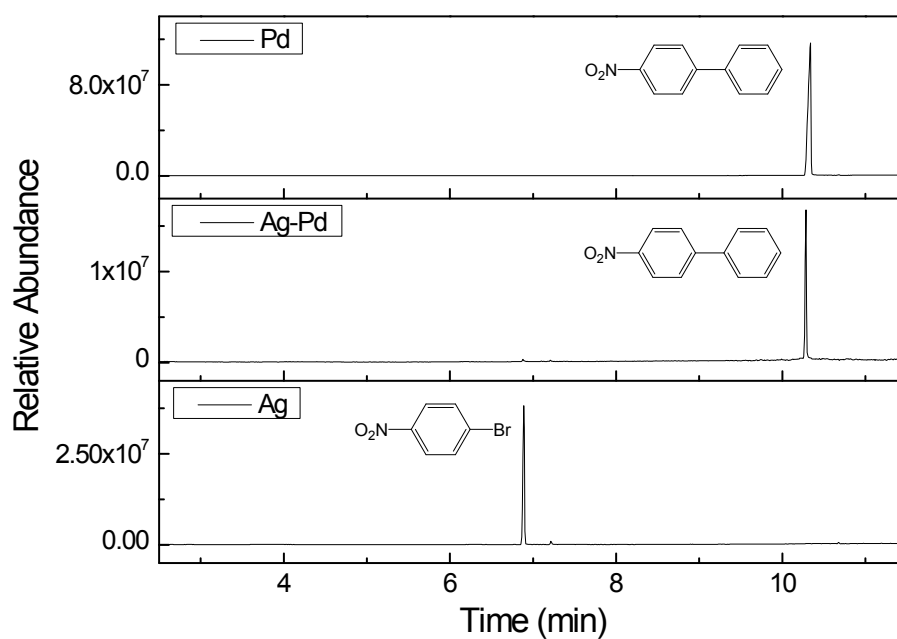

Figure S2. Gas Chromatography-Mass Spectrometry (GC-MS) of the Suzuki–Miyaura carbon coupling (SMCC) reaction between phenylboronic acid and 1-bromo-4-nitrobenzene.

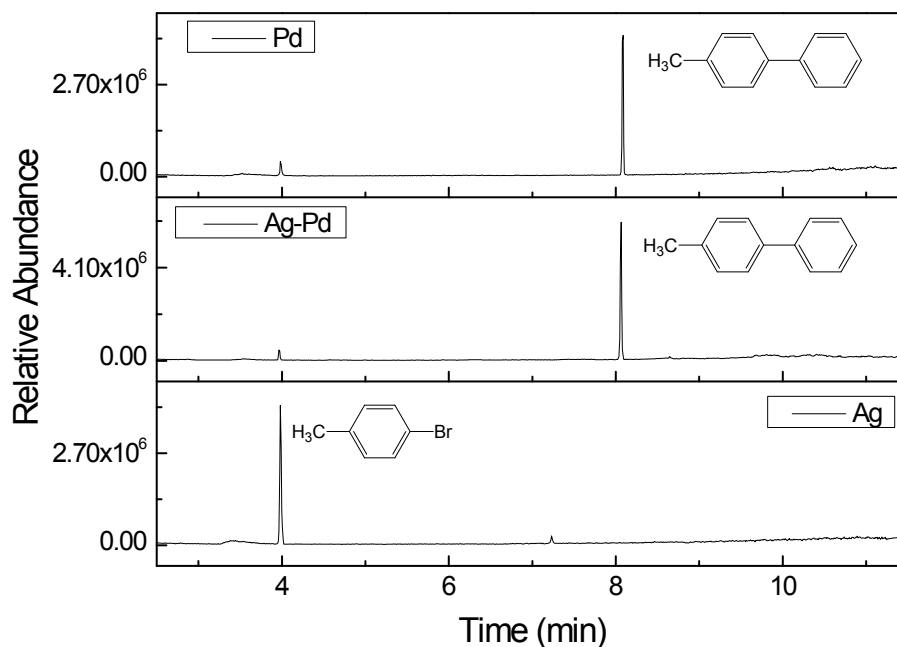

Figure S3. GC-MS of the SMCC reaction between phenylboronic acid and 4-bromotoluene.

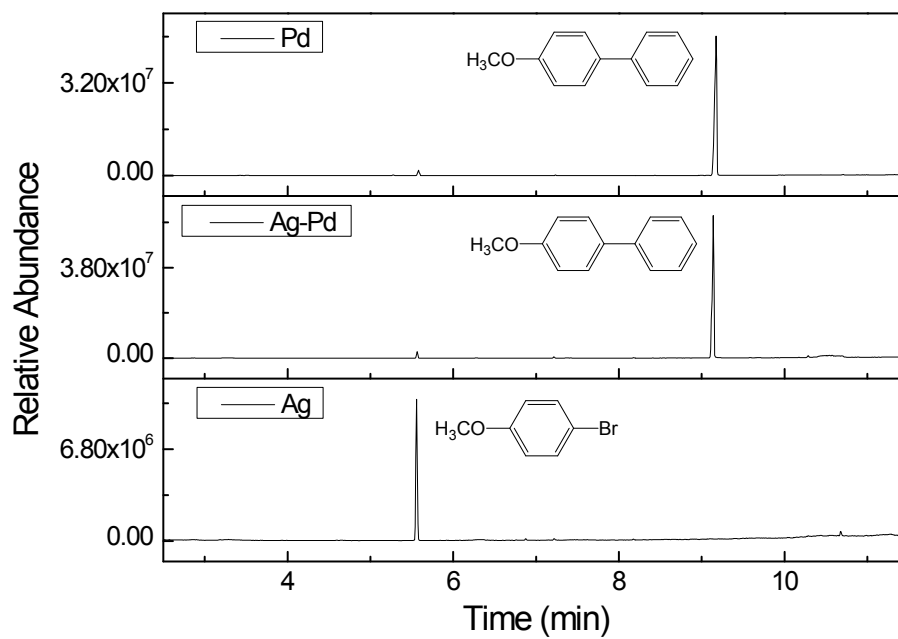

Figure S4. GC-MS of the SMCC reaction between phenylboronic acid and 4-bromoanisole.

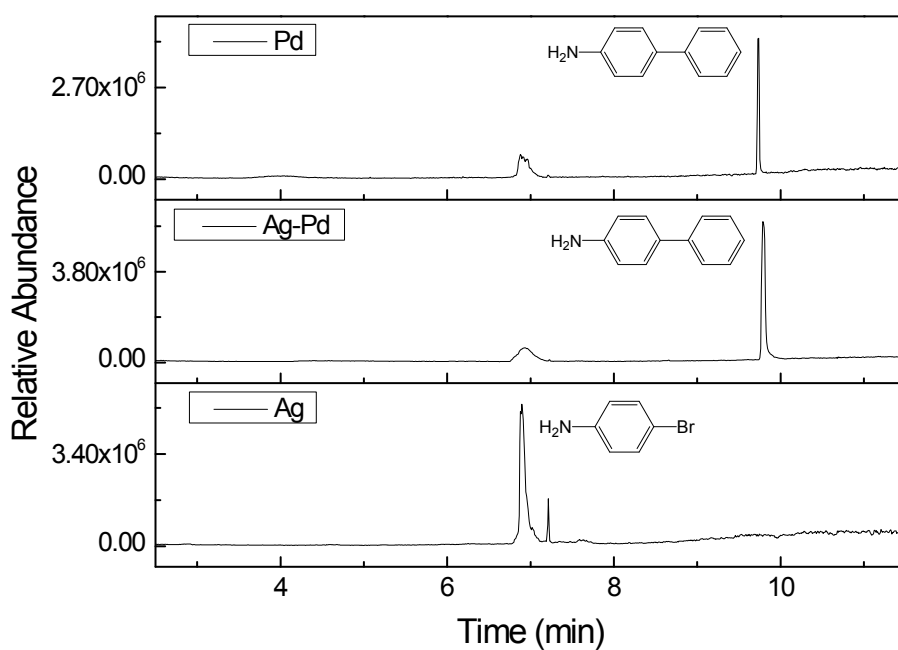

Figure S5. GC-MS of the SMCC reaction between phenylboronic acid and 4-bromoaniline.

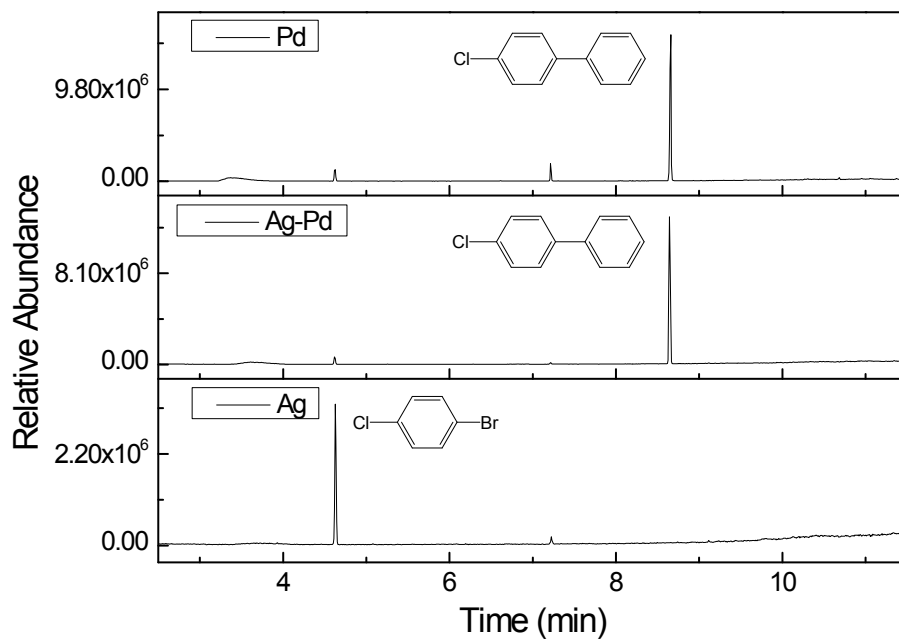

Figure S6. GC-MS of the SMCC reaction between phenylboronic acid and 4-bromoaniline.

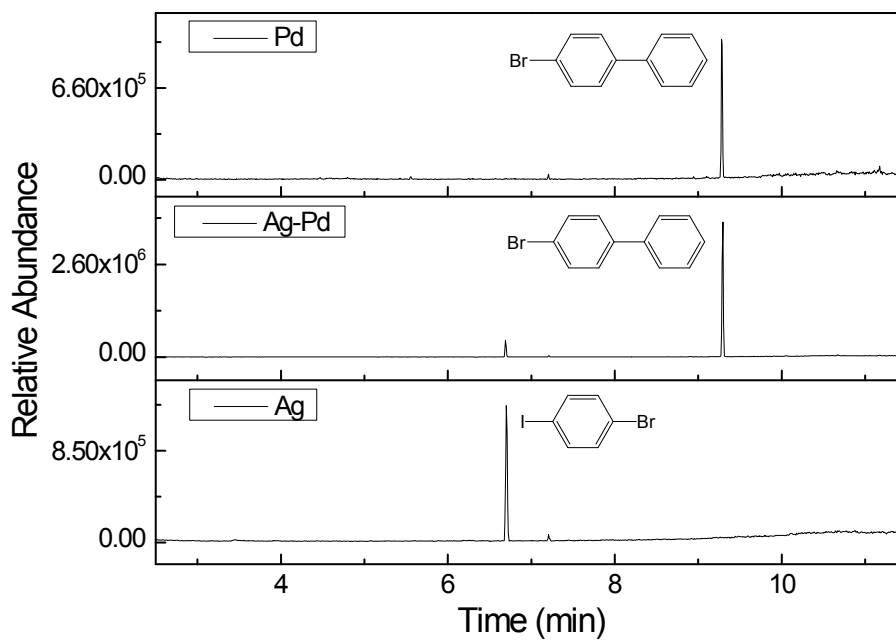

Figure S7. GC-MS of the SMCC reaction between phenylboronic acid and 1-bromo-4-iodobenzene.

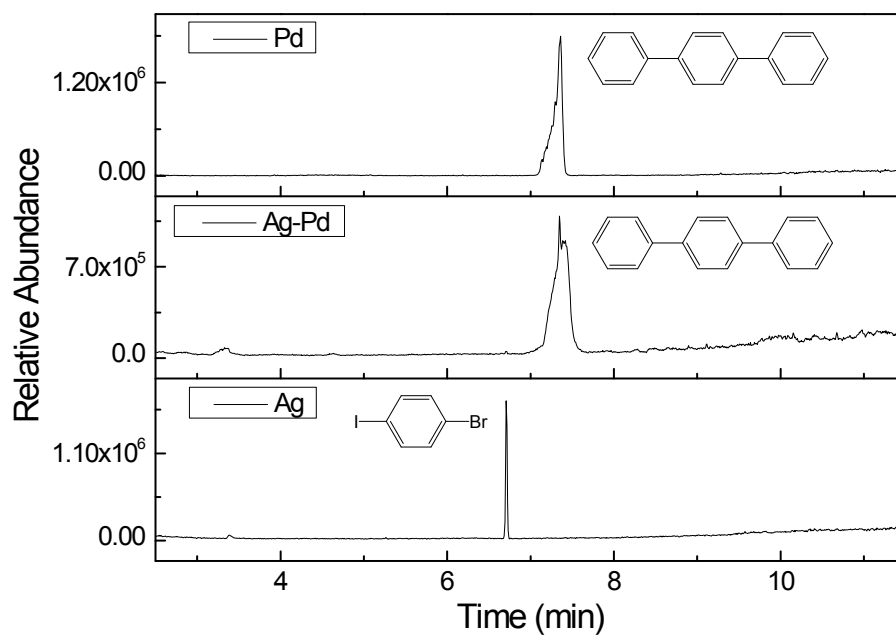

Figure S8. GC-MS of the SMCC reaction between phenylboronic acid and 1-bromo-4-iodobenzene.

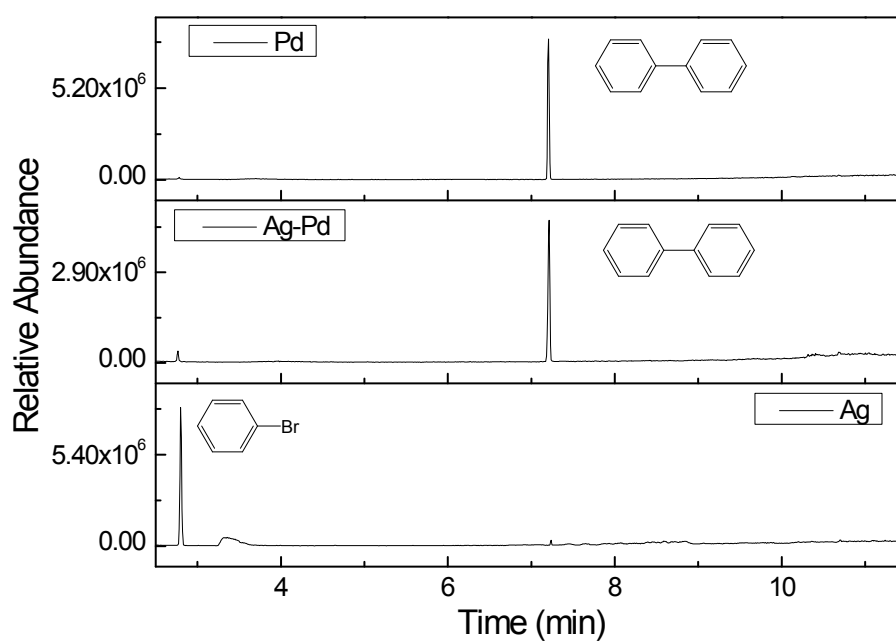

Figure S9. GC-MS of the SMCC reaction between phenylboronic acid and bromobenzene.

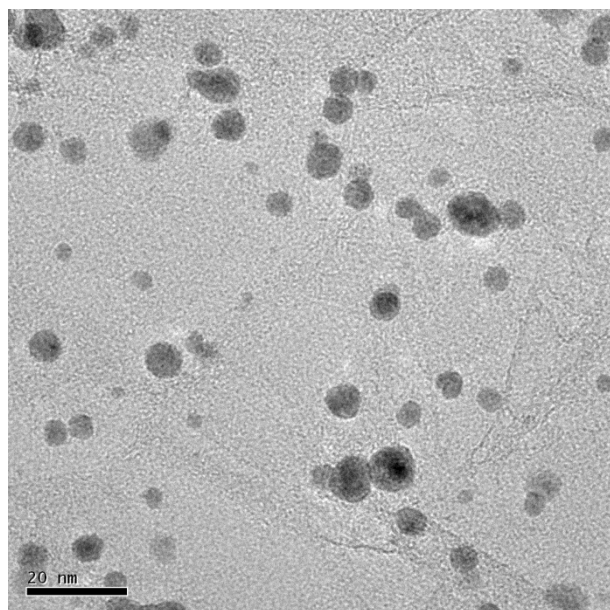

Figure S10. TEM images of the Ag-Pd@rGO bimetallic nanoparticles after SCC reaction

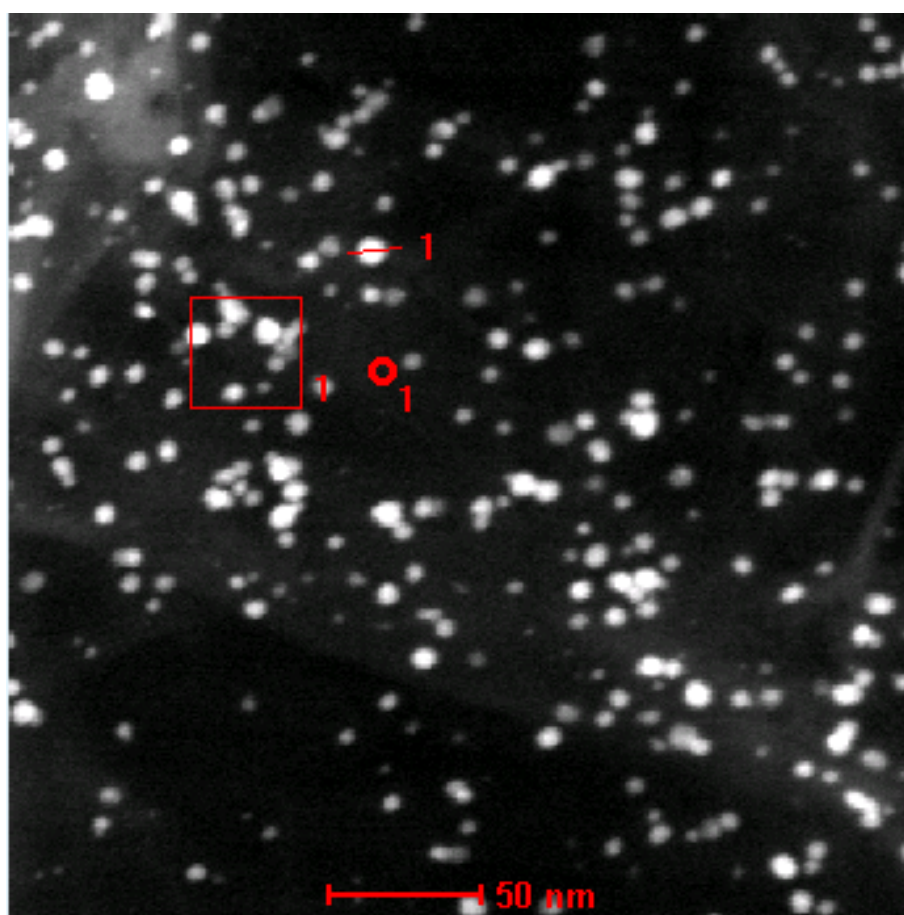

Figure S11. HAADF-STEM images of the Ag-Pd@rGO bimetallic nanoparticles
